# Supplementary material
Source: publisher figshare collection journal article supplement (https://gsajournals.figshare.com/ndownloader/files/21502521)
Supplement: Supplementary file 1 [file 21502521]

**Supplemental Table S5. Quantitative genetic analysis of phenotypes.**

| Parameter | Symbol | Basal Activity | Induced Activity |
| --- | --- | --- | --- |
| Mean | μ | 23.101 | 46.811 |
| Genetic variance | σG2 | 514.756 | 935.253 |
| Genetic standard dev. | σG | 22.688 | 30.582 |
| Environmental variance | σE2 | 272.356 | 271.135 |
| Environmental standard deviation | σE | 16.503 | 16.466 |
| Phenotypic variance | σP2 | 787.111 | 1206.387 |
| Phenotypic standard Deviation | σP | 28.056 | 34.733 |
| Heritability | H2 | 0.653 | 0.775 |
| Coefficient of genetic Variation | CVG | 98.212 | 65.331 |
| Coefficient of environmental variation | CVE | 71.438 | 35.175 |
| Cross-sex genetic corr. | rMF | 0.282 | 0.850 |
| Genetic correlation | rg | 0.354 | 0.851 |

Activity measured by 5 minutes.
